# Supplementary material
Source: HighWire-hosted journal article supplement (http://www.cmajopen.ca/highwire/filestream/80851/field_highwire_adjunct_files/0/open-2015-0135-1-at.pdf)
Supplement: open-2015-0135-1-at.pdf [file open-2015-0135-1-at.pdf]

| <b>Appendix 1 (as supplied by the authors): Institutions</b>                         |                       |                                            |
|--------------------------------------------------------------------------------------|-----------------------|--------------------------------------------|
|                                                                                      | <b>Security Level</b> | <b>Approximate Capacity*<sup>1,2</sup></b> |
| <b>Kingston Penitentiary</b>                                                         | Maximum               | 500                                        |
| <b>Collins Bay Institution</b>                                                       | Medium                | 225                                        |
| <b>Bath Institution</b>                                                              | Medium                | 330                                        |
| <b>Millhaven Institution</b>                                                         | Maximum               | 430                                        |
| <b>Pittsburgh Institution</b>                                                        | Minimum               | 200                                        |
| <b>Frontenac Institution</b>                                                         | Minimum               | 150                                        |
| <b>Joyceville Institution</b>                                                        | Medium                | 450                                        |
| <b>Regional Treatment Centre</b>                                                     | Multi-level           | 143                                        |
| <b>Warkworth Institution</b>                                                         | Medium                | 537                                        |
| <b>TOTAL</b>                                                                         |                       | <b>2965</b>                                |
| *The capacities listed approximate those at the time of consultation. <sup>1,2</sup> |                       |                                            |

## References

1. Parole Board of Canada. Photographs of Federal Penitentiaries. Available at: [http://pbc-clcc.gc.ca/victims/photos/Ontario/kingston\\_1-eng.shtml](http://pbc-clcc.gc.ca/victims/photos/Ontario/kingston_1-eng.shtml) (Accessed June 9, 2015).
2. Correctional Service Canada. Ontario Region. Available at: <http://www.csc-scc.gc.ca/institutions/001002-3000-eng.shtml> (Accessed June 9, 2015).

Appendix to: Gavigan G, McEvoy A, Walker J. Patterns of skin disease in a sample of the federal prison population: a retrospective chart review. *CMAJ Open* 2016. DOI:10.9778/cmajo.20150135.
